# Supplementary material for: Single-cell RNA Sequencing Reveals Sexually Dimorphic Transcriptome and Type 2 Diabetes Genes in Mouse Islet β Cells
Source: PubMed Central journal article supplement (PMC8864195; doi:10.1016/j.gpb.2021.07.004), 2021-09-24

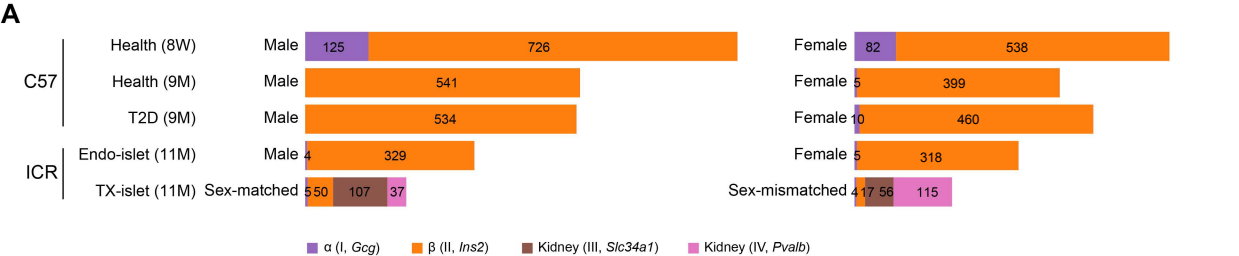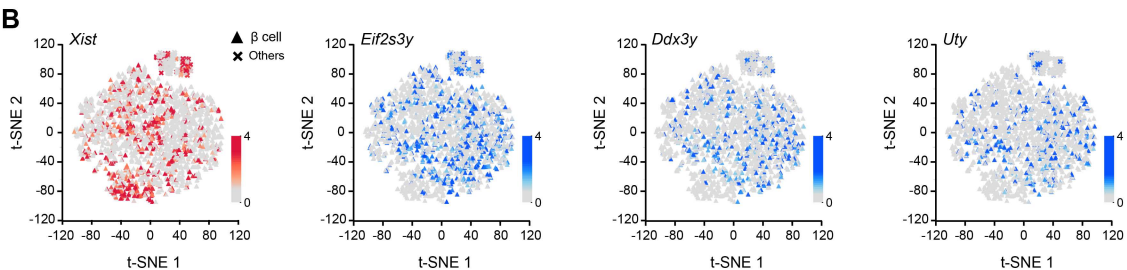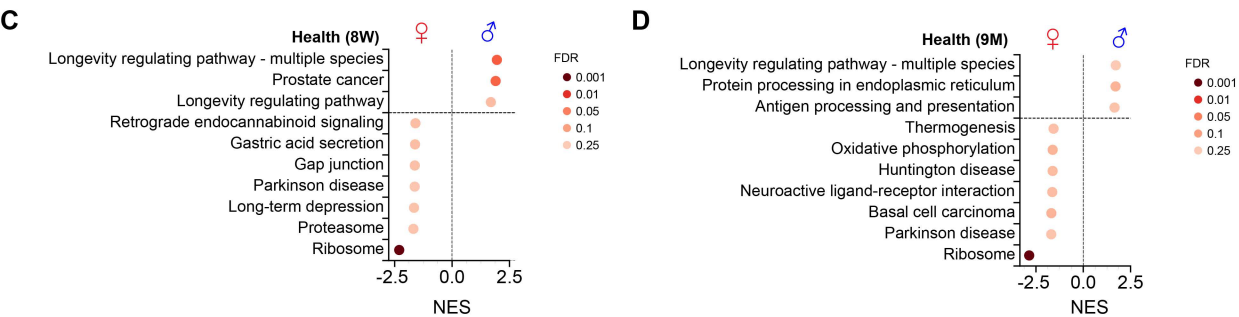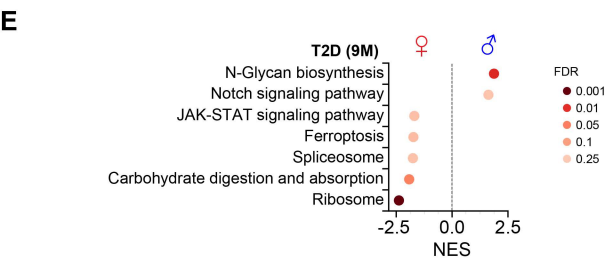

Supplement: mmc1.pdf [file mmc1.pdf]
